# Supplementary material
Source: PubMed Central journal article supplement (PMC8740760)
Supplement: JSLHR-64-1841-s002.pdf [file JSLHR-64-1841-s002.pdf]

## Supplemental Material S2. Deviation response.

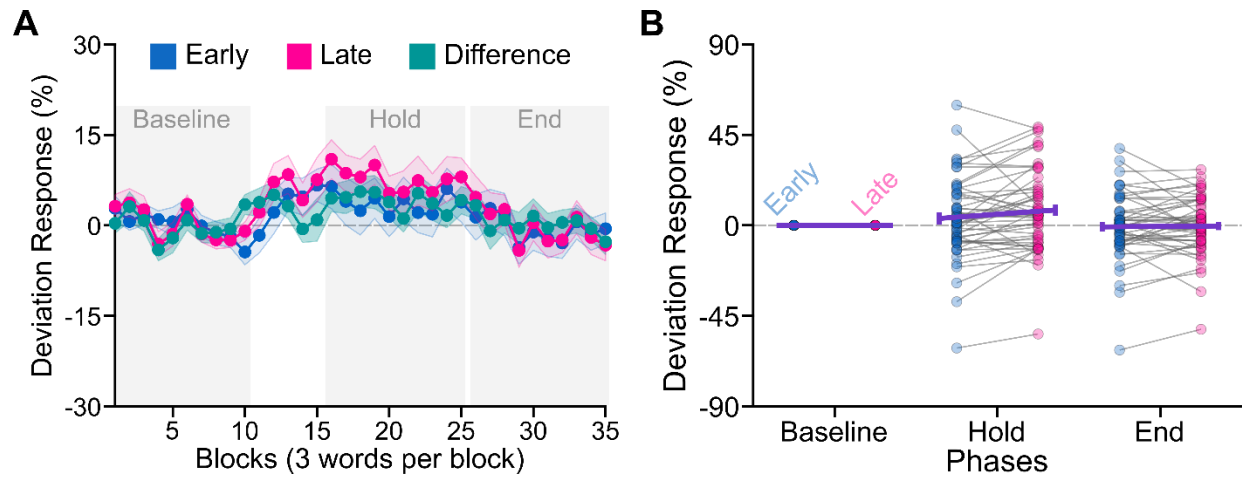

Panel A shows the group-average trajectories of the deviation responses. Examining deviation responses (B), we found a statistically significant main effect of Phase,  $F(2,833) = 22.751$ ,  $p < .001$ , with larger deviation responses in the hold phase relative to the baseline and end phases. All other main effects and interactions were not statistically significant ( $p > .058$  in all cases).
