# Supplementary material
Source: PubMed Central journal article supplement (PMC8740760)
Supplement: JSLHR-64-1841-s003.pdf [file JSLHR-64-1841-s003.pdf]

**Supplemental Material S3.** Qualitative comparison between the state-space model and simpleDIVA model.

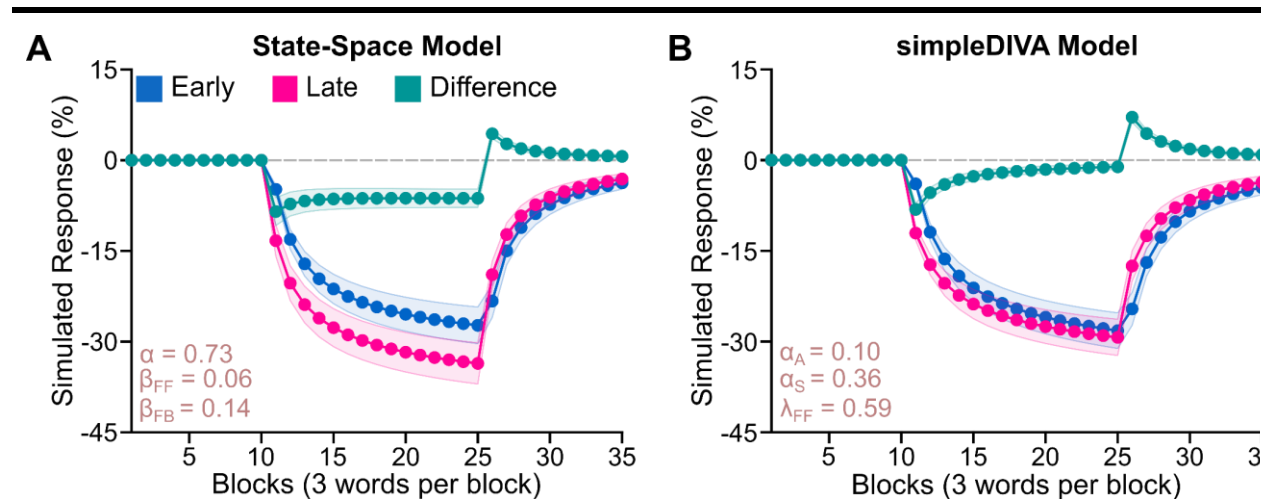

To qualitatively compare the state-space model and the simpleDIVA model, we fitted the simpleDIVA to each participant's adaptive responses. The average simulated responses of all participants are shown in panel A (state-space model) and B (simpleDIVA). These results showed that the two models performed similarly with one noticeable difference: the difference responses at the end of the hold phase appeared to be smaller (or nonexistent) for the simpleDIVA. The average of the models' parameters (across all participants) are shown in each panel (for a detailed description of the simpleDIVA model, see Kearney et al., 2020).
